# Supplementary material for: Performance of HADDOCK and a simple contact-based protein–ligand binding affinity predictor in the D3R Grand Challenge 2
Source: PubMed Central journal article supplement (PMC5767195; doi:10.1007/s10822-017-0049-y), 2017-08-22
Supplement: 10822_2017_49_MOESM1_ESM.pdf [file 10822_2017_49_MOESM1_ESM.pdf]

## Supplementary Information

### Performance of HADDOCK and a simple contact-based protein-ligand binding affinity predictor in the D3R Grand Challenge 2

Zeynep Kurkcuoglu<sup>1\*</sup>, Panagiotis I. Koukos<sup>1\*</sup>, Nevia Citro<sup>1</sup>, Mikael E. Trellet<sup>1</sup>, J.P.G.L.M. Rodrigues<sup>3</sup>, Irina S. Moreira<sup>1,2</sup>, Jorge Roel-Touris<sup>1</sup>, Adrien S.J. Melquiond<sup>1</sup>, Cunliang Geng<sup>1</sup>, Jörg Schaarschmidt<sup>1</sup>, Li C. Xue<sup>1</sup>, Anna Vangone<sup>1</sup>, A.M.J.J. Bonvin<sup>1</sup>

<sup>1</sup>Bijvoet Center for Biomolecular Research, Faculty of Science - Chemistry, Utrecht University, Padualaan 8, Utrecht, 3584CH, the Netherlands

<sup>2</sup>CNC - Center for Neuroscience and Cell Biology; Rua Larga, FMUC, Polo I, 1<sup>o</sup>andar, Universidade de Coimbra, 3004-517, Coimbra, Portugal.

<sup>3</sup>James H. Clark Center, Stanford University, 318 Campus Drive, S210, Stanford, CA 94305, USA

# To whom correspondence should be addressed: [a.m.j.j.bonvin@uu.nl](mailto:a.m.j.j.bonvin@uu.nl), phone: +31 30 2533859

\*Joint first authors

**Table S1. HADDOCK parameters used for dockings**

| Parameter                                          | Setting                                                                                                                                 |
|----------------------------------------------------|-----------------------------------------------------------------------------------------------------------------------------------------|
| It0 sampling (rigid body docking)                  | 10,000                                                                                                                                  |
| It1 sampling (semi-flexible simulated annealing)   | 400                                                                                                                                     |
| Delenph                                            | False                                                                                                                                   |
| Inter rigid                                        | 0.001                                                                                                                                   |
| Tadinit2 t                                         | 500                                                                                                                                     |
| Tadfinal2 t                                        | 50                                                                                                                                      |
| Tadinit3 t                                         | 500                                                                                                                                     |
| Tadfinal3 t                                        | 50                                                                                                                                      |
| Initiosteps                                        | 0                                                                                                                                       |
| Cool1_steps                                        | 0                                                                                                                                       |
| W_vdw_0                                            | 0                                                                                                                                       |
| Protein interface residue list                     | 269,273,274,277,287,288,291,292,294,<br>295,298,332,333,335,336,339,340,346,347,<br>352,356,359,361,365,369,370,373,451,454,458,469,473 |
| amb = ExtStageConstants (firstit = 0, lastit = 0,) |                                                                                                                                         |

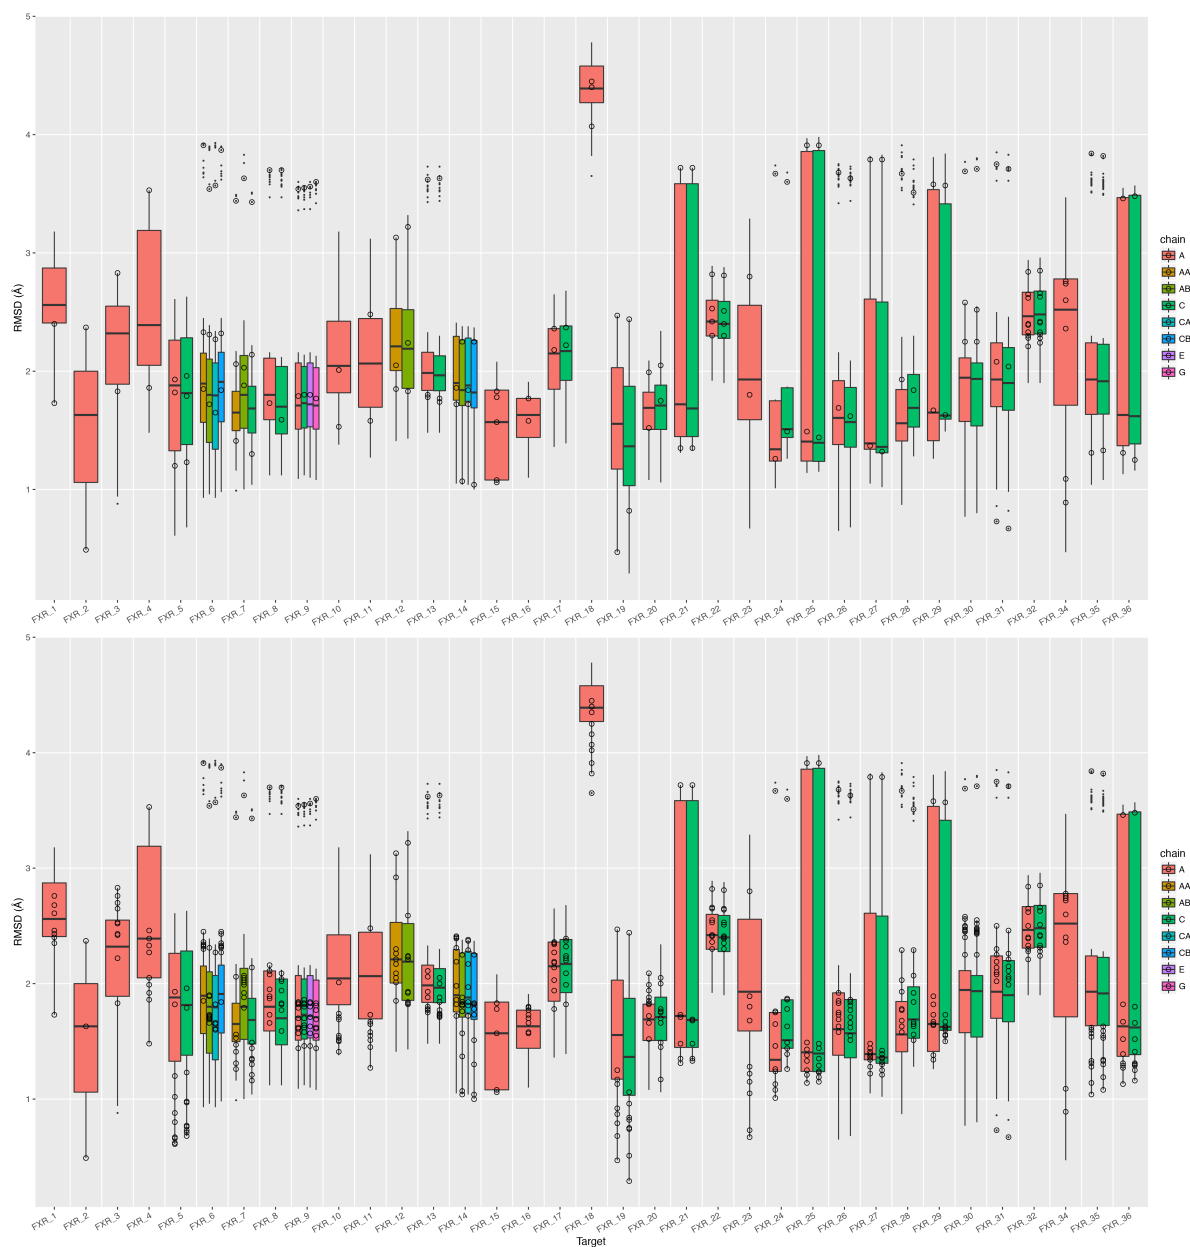

**Figure S1:** RMSD values of the OMEGA generated ligand conformers against the reference structures. The boxplots are colored according to the chain ID of the reference chain used for the calculations. Circles indicate the RMSD values of the poses that were selected for docking. The top panel corresponds to the conformer selection for stage 1 and the bottom one to the conformer selection for stage 2.

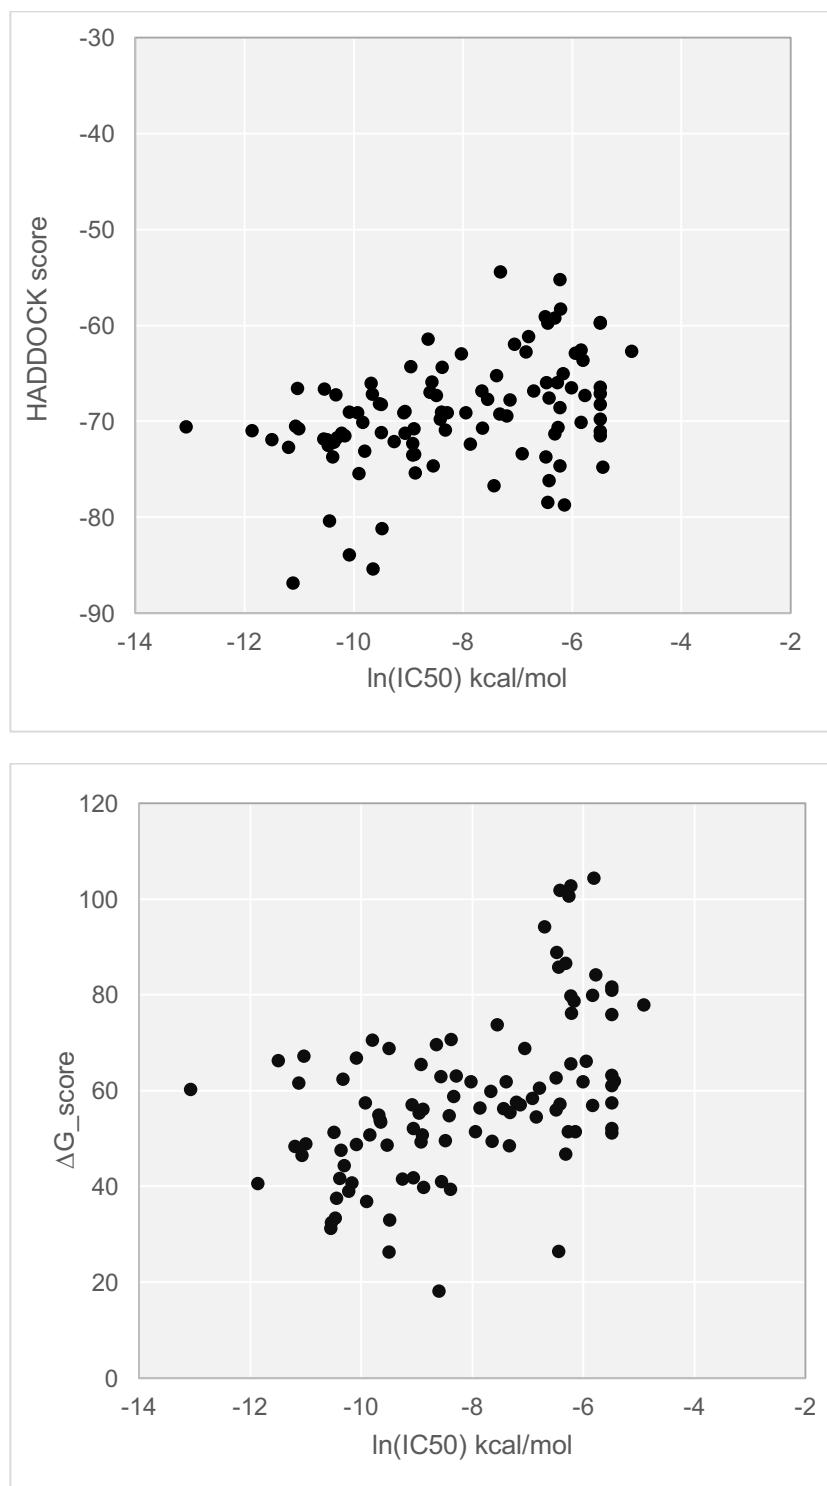

**Figure S2:** Scatter plot between the HADDOCK score for Stage 1 (top panel) and  $\Delta G$ score for Stage 2 (bottom panel) versus the experimental binding affinities reported as  $\ln(\text{IC}_{50})$ . The corresponding Pearson's correlation coefficients are 0.40 and 0.51 for Stage 1 and Stage 2, respectively. The  $\Delta G$ \_scores have been calculated with our structure-based binding affinity predictor (see Eq. 2 in the main text), averaged over the top10 best models refined with the refinement interface of the HADDOCK2.2 web server.
